# Supplementary material
Source: publisher site journal article supplement (https://www.dovepress.com/article/402510)
Supplement: Supplementary file 1 [file get_supplementary_file.php]

Supplementary Materials

Associations between thinner retinal neuronal layers and suboptimal brain structural integrity in a middle-aged cohort

Ashleigh Barrett-Young, Wickliffe C. Abraham, Carol Y. Cheung, Jesse Gale, Sean Hogan, David Ireland, Ross Keenan, Annchen R. Knodt, Tracy R. Melzer, Terrie E. Moffitt, Sandhya Ramrakha, Yih Chung Tham, Graham A. Wilson, Tien Yin Wong, Ahmad. R. Hariri, & Richie Poulton

**Magnetic resonance imaging**

***Procedure*.** Study members were scanned using a MAGNETOM Skyra 3T scanner (Siemens Healthcare, Erlangen, Germany) equipped with a 64-channel head and neck coil (due to head size constraints, seven participants were scanned with a 20-channel head/neck coil) at the Pacific Radiology Group imaging centre in Dunedin, New Zealand, between August 2016 and April 2019. High resolution T1-weighted images, three-dimensional fluid-attenuated inversion recovery (FLAIR) images, and a gradient echo field map were obtained. Structural MRI data were analysed using the Human Connectome Project (HCP) minimal preprocessing pipeline.40 Outputs of the preprocessing pipeline were visually checked for accurate surface generation by examining each participant’s myelin map, pial surface, and white matter boundaries. Study personnel who processed the MRI images were masked to participants’ retinal measurements. Of the 875 Study members for whom structural MRI data were available, 4 were excluded due to major incidental findings or previous injuries (e.g., large tumours or extensive damage to the brain/skull), 9 due to missing FLAIR or field map scans, and 1 due to poor surface mapping, yielding 861 datasets for analyses. Additionally, white matter hyperintensities measurements were removed from the dataset for 3 SMs due to multiple sclerosis and 6 Study members due to inaccurate labelling or low-quality data, yielding 852 datasets for WMH analysis.

*Image acquisition parameters*.High resolution T1-weighted images were obtained using an MP-RAGE sequence with the following parameters: TR=2400 ms; TE=1.98 ms; 208 sagittal slices; flip angle, 9°; FOV, 224mm; matrix=256×256; slice thickness=0.9mm with no gap (voxel size 0.9×0.875×0.875mm); and total scan time=6 min 52 sec. 3D fluid-attenuated inversion recovery (FLAIR) images were obtained with the following parameters: TR=8000ms; TE=399ms; 160 sagittal slices; FOV=240mm; matrix=232×256; slice thickness=1.2mm (voxel size 0.9×0.9×1.2mm); and total scan time=5 min 38 sec. Additionally, a gradient echo field map was acquired with the following parameters: TR=712ms; TE=4.92 and 7.38ms; 72 axial slices; FOV=200mm; matrix=100×100; slice thickness=2.0mm (voxel size 2mm isotropic); and total scan time=2 min 25 sec.

*Image processing*.Structural MRI data were analyzed using the Human Connectome Project (HCP) minimal preprocessing pipeline as extensively detailed elsewhere.40 Briefly, T1-weighted and FLAIR images were processed through the PreFreeSurfer, FreeSurfer, and PostFreeSurfer pipelines. T1-weighted and FLAIR images were corrected for readout distortion using the gradient echo field map, coregistered, brain-extracted, and aligned together in the native T1 space using boundary-based registration.44 Images were then processed with a custom FreeSurfer recon-all pipeline that is optimized for structural MRI with higher resolution than 1 mm isotropic. Finally, recon-all output were converted into CIFTI format and registered to common 32k_FS_LR mesh using MSM-sulc.45

***Brain Age Gap Estimate.*** The brain Age Gap Estimate (brainAGE; ICC for test-retest reliability=.81) is a score that represents the difference, or gap, between a person’s chronological age and their estimated age based on multiple measures of brain structure including cortical thickness, surface area, and volume of subcortical grey matter, white matter, and cerebrospinal fluid.35 The formation of this measure has been described previously.41

***White matter hyperintensities.*** To identify and extract the total volume of white matter hyperintensities (WMH), T1-weighted and FLAIR images for each participant were processed with UBO Detector, a cluster-based, fully-automated pipeline with high reliability in our data (test-retest ICC=0.87, 95% CI .73-.95) and out of sample performance.42 The resulting WMH probability maps were thresholded at 0.7, which is the suggested standard. WMH volume is measured in Montreal Neurological Institute (MNI) space, removing the influence of differences in brain volume and intracranial volume on WMH volume. Because of the potential for bias and false positives due to the thresholds and masks applied in UBO, the resulting WMH maps for each participant were manually checked by two independent raters to ensure that false detections did not substantially contribute to estimates of WMH volume. Visual inspections were done blind to the participants’ cognitive status. Due to the tendency of automated algorithms to mislabel regions surrounding the septum as white matter hyperintensities, these regions were manually masked out, to further ensure the most accurate grading possible.

***Subcortical grey matter volume.*** Grey matter volumes were extracted for 10 subcortical structures using the FreeSurfer aseg parcellation (<https://surfer.nmr.mgh.harvard.edu/>).

***Parcel-wise cortical surface area and cortical thickness.*** For each subject the mean cortical thickness and surface area were extracted from each of the 360 cortical areas in the HCP-MPP1.0 parcellation.43 Subcortical volumes were extracted separately using the automatic segmentation (“aseg”) step of FreeSurfer version 6.0. FreeSurfer version 6.0 was used because the HCP FreeSurfer pipeline was optimized for the cortical surface, resulting in lower-quality segmentation of subcortical volumes in our dataset. Outputs of the minimal preprocessing pipeline were visually checked for accurate surface generation by examining each subject’s myelin map, pial surface, and white matter boundaries. Accuracy of subcortical segmentation was confirmed by visual inspection of the "aseg" labels overlaid on the volumes.

All measures were checked for test-retest reliability (brainAGE ICC=.81; white matter hyperintensities volume ICC=.87; subcortical grey matter volume mean ICC=.956; total cortical surface area ICC=.996; average cortical thickness ICC=.94; parcel-wise cortical thickness mean ICC=.846; parcel-wise surface area mean ICC=.942).
